# Supplementary material for: Contemporary Trends and Outcomes of Percutaneous and Surgical Aortic Valve Replacement in Patients With Cancer
Source: PubMed Central journal article supplement — J Am Heart Assoc. 2020 Jan 21;9(2):e014248. doi: 10.1161/JAHA.119.014248 (PMC7033818; doi:10.1161/jaha.119.014248), 2020-01-21
Supplement: JAH3-9-e014248-s001.pdf [file JAH3-9-e014248-s001.pdf]

# **SUPPLEMENTAL MATERIAL**

## **Data S1.**

### **Propensity Model**

A non-parsimonious multivariate logistic regression was performed using gender, age, race/ethnicity, primary insurance type, income, presence of CHF, CAD, prior MI, prior CABG, AF, HTN, diabetes, renal disease, chronic lung disease, coagulopathy, smoking, Elixhauser's comorbidity (0,1,2,>2), hospital region, hospital type, hospital size, discharge weight as variables, to generate the propensity score<sup>1</sup>. NIS weights were used in the propensity estimation model. The propensity score (0 and 1) is obtained using an 8@1 Digit Match algorithm<sup>2</sup>. This algorithm matches a case to control at the 8th, 7th, 6th ... decimal point, using a greedy matching algorithm. We then matched 2 non-cancer patients to every 1 cancer patient (2:1 match). We generated propensity scores on the 2012-2015 cohort of admissions for any aortic valve procedure among cancer patients to calculate the standardized morbidity ratio. This was used to present standardized associations between hospitalizations for TAVR, compared to SAVR, on in-hospital complications, discharge disposition, and length of stay.

**Table 1. Diagnosis codes used in the study.**

| <b>Procedure</b>                              | <b>ICD-9 code</b>                                                                                                                                                            | <b>CCS code</b>                                                                                                  | <b>Comorbidity field from NIS</b> |
|-----------------------------------------------|------------------------------------------------------------------------------------------------------------------------------------------------------------------------------|------------------------------------------------------------------------------------------------------------------|-----------------------------------|
| <b>Cohort Creation</b>                        |                                                                                                                                                                              |                                                                                                                  |                                   |
| Cancer                                        | 162.xx,174.xx,175.xx,153.xx,154.xx,185.xx,182.xx,183.xx,188.x<br>x,189.xx,200.xx,201.xx,202.xx,204.xx,205.xx,206.xx,207.xx,208.<br>xx,155.xx,156.xx,172.xx,193.xx,<br>157.xx | 11,12,13,14,15,16,17,18,19,20,21,22,23,24,25,<br>26,27,28,29,30,31,32,33,34,35,36,37,38,39,40,<br>41,42,43,44,45 | CM_LYMPH,<br>CM_TUMOR*            |
| <b>Comorbidities/co-diagnosis<sup>‡</sup></b> |                                                                                                                                                                              |                                                                                                                  |                                   |
| Cardiomyopathy                                | 425.xx                                                                                                                                                                       |                                                                                                                  |                                   |
| Known Coronary Artery Disease                 | 414.00, 414.01, 414.02, 414.03,<br>414.04, 414.05, 414.06, 414.07                                                                                                            |                                                                                                                  |                                   |
| Prior Myocardial Infarction                   | 412.xx                                                                                                                                                                       |                                                                                                                  |                                   |
| Prior Percutaneous Coronary Intervention      | V45.82                                                                                                                                                                       |                                                                                                                  |                                   |
| Prior Coronary Bypass Grafting                | V45.81                                                                                                                                                                       |                                                                                                                  |                                   |
| Carotid Disease                               | 433.10                                                                                                                                                                       |                                                                                                                  |                                   |
| Prior TIA/Stroke                              | 438.xx,V12.54                                                                                                                                                                |                                                                                                                  |                                   |
| Atrial Fibrillation                           | 427.31                                                                                                                                                                       |                                                                                                                  |                                   |
| Hypertension                                  |                                                                                                                                                                              | 98,99                                                                                                            | CM_HTN_C                          |
| Diabetes                                      |                                                                                                                                                                              | 49,50                                                                                                            | CM_DX,CM_DMCX                     |

|                                  |                                                                                                                                                        |     |                 |
|----------------------------------|--------------------------------------------------------------------------------------------------------------------------------------------------------|-----|-----------------|
| Obesity                          | 278.xx                                                                                                                                                 |     | CM_OBESE        |
| Chronic Kidney Disease           |                                                                                                                                                        | 158 | CM_RENLFA<br>IL |
| Hyperlipidemia                   |                                                                                                                                                        | 53  |                 |
| Peripheral Vascular Disease      |                                                                                                                                                        | 114 | CM_PERIVAS<br>C |
| Smoking                          | 305.1x, V158.2                                                                                                                                         |     |                 |
|                                  |                                                                                                                                                        |     |                 |
| <b>Procedures</b>                |                                                                                                                                                        |     |                 |
|                                  |                                                                                                                                                        |     |                 |
| <b>In-Hospital Complications</b> |                                                                                                                                                        |     |                 |
| Acute Kidney Injury              | 584.5x, 584.6x, 584.7x, 584.8x, 584.9x                                                                                                                 | 157 |                 |
| Vascular Complication            | 900.xx, 901.xx, 902.xx, 903.xx, 904.xx, 998.2x, 999.2x, 997.7x, 447.0x, 868.04<br>AND<br>39.31, 39.41, 39.49, 39.52, 39.56, 39.57, 39.59, 39.79        |     |                 |
| Stroke                           | 431.xx, 435.0x, 435.1x, 435.2x, 435.3x, 435.8x, 435.9x, 433.01, 433.11, 433.21, 433.31, 433.81, 433.91, 434.01, 434.11, 434.91, 997.01, 344.60, 344.61 |     |                 |
| Myocardial Infarction            | 411.1x, 410.11, 410.21, 410.31, 410.41, 410.51, 410.61, 410.71, 410.81, 410.91, 410.01                                                                 |     |                 |
| Cardiogenic Shock                | 785.51                                                                                                                                                 |     |                 |
| Cardiac Arrest                   | 427.5x, 427.41                                                                                                                                         |     |                 |
| Blood Transfusion                | 99.00, 99.01, 99.02, 99.03, 99.04                                                                                                                      |     |                 |
| Pacemaker Implantation           | 37.80, 37.81, 37.82, 37.83, 00.50                                                                                                                      |     |                 |

**Table S2. Complications, length of stay and disposition after TAVR and SAVR, among cancer and non-cancer patients from 2012-2015. The absolute numbers are weighted.**

| TAVR                                          |                     |                         |         | SAVR                |                         |         |
|-----------------------------------------------|---------------------|-------------------------|---------|---------------------|-------------------------|---------|
|                                               | Cancer (N = 10,670) | Non-Cancer (N = 36,625) | P-value | Cancer (N = 17,290) | Non-Cancer (N = 96,115) | P-value |
| <b>In-hospital Complications (N, %)</b>       |                     |                         |         |                     |                         |         |
| Permanent pacemaker implantation              | 1,210 (11.3)        | 3,990 (10.9)            | 0.57    | 960 (5.6)           | 4,605 (4.8)             | 0.05    |
| Transient ischemic attack/stroke              | 255 (2.4)           | 1,000 (2.7)             | 0.332   | 395 (2.3)           | 2,400 (2.5)             | 0.41    |
| Cardiogenic shock                             | 195 (1.8)           | 945 (2.6)               | 0.04    | 415 (2.4)           | 2,815 (2.9)             | 0.07    |
| Cardiac arrest                                | 360 (3.4)           | 1,365 (3.7)             | 0.46    | 490 (2.8)           | 2,910 (3.0)             | 0.55    |
| Acute kidney injury                           | 1,525 (14.3)        | 6,340 (17.3)            | 0.001   | 2,595 (15.0)        | 14,290 (14.9)           | 0.81    |
| Blood transfusion                             | 2,110 (19.8)        | 7,045 (19.2)            | 0.61    | 5,800 (33.6)        | 29,430 (30.6)           | 0.0004  |
| <b>Discharge Disposition and Outcomes (%)</b> |                     |                         | 0.008   |                     |                         | <0.0001 |
| Home Discharge                                | 4,395 (41.2)        | 13,550 (37.1)           |         | 5,580 (32.3)        | 7,141 (37.2)            |         |
| Transfer to SNF or acute care hospital        | 3,305 (31.0)        | 11,560 (31.6)           |         | 6,785 (39.3)        | 35,105 (36.5)           |         |
| Home Health Care                              | 2,720 (25.5)        | 10,340 (28.2)           |         | 4,635 (26.8)        | 23,305 (24.3)           |         |
| In-hospital Mortality                         | 250 (2.3)           | 1,160 (3.2)             | 0.043   | 270 (1.6)           | 1,895 (2.0)             | 0.11    |
| <b>LOS after AVR, days (Mean ±SE)</b>         | 5.0±0.1             | 5.4±0.1                 | <0.0001 | 7.1±0.1             | 7.2±0.04                | <0.0001 |

LOS, length of stay; AVR, aortic valve replacement; TAVR, transcatheter aortic valve replacement; SAVR, surgical aortic valve replacement; SNF, skilled nursing facility.

**Table S3. Standardized associations between hospitalizations for TAVR, compared to SAVR, on in-hospital complications, discharge disposition, and length of stay after valve replacement, among cancer and non-cancer patients who underwent TAVR.**

|                                           | <b>Breast Cancer<br/>[OR (95% CI)]</b> | <b>Lung Cancer [OR<br/>(95% CI)]</b> | <b>Colon Cancer<br/>[OR (95% CI)]</b> | <b>Prostate Cancer<br/>[OR (95% CI)]</b> | <b>Other Cancers<br/>[OR (95% CI)]</b> |
|-------------------------------------------|----------------------------------------|--------------------------------------|---------------------------------------|------------------------------------------|----------------------------------------|
| <b>In-hospital Complications</b>          |                                        |                                      |                                       |                                          |                                        |
| Permanent pacemaker implantation          | 1.97 (1.15, 3.37)                      | 5.40 (1.80,16.24)                    | 7.49 (2.76, 20.34)                    | 3.74 (2.15, 6.51)                        | 1.57 (1.11, 2.21)                      |
| Transient ischemic attack/stroke          | 1.44 (0.58, 3.55)                      | 0.61 (0.17, 2.22)                    | 1.65 (0.34, 7.01)                     | 0.80 (0.38, 1.68)                        | 0.71 (0.40, 1.26)                      |
| Cardiogenic shock                         | 0.90 (0.33, 2.45)                      | 0.31 (0.03, 3.05)                    | 0.63 (0.18, 2.24)                     | 0.41 (0.14, 1.19)                        | 0.53 (0.30, 0.92)                      |
| Cardiac arrest                            | 1.19 (0.52, 2.71)                      | 2.41 (0.64, 9.18)                    | 4.62 (0.97, 21.90)                    | 1.49 (0.64, 3.46)                        | 0.94 (0.57, 1.56)                      |
| Acute kidney injury                       | 0.76 (0.50, 1.17)                      | 0.57 (0.30, 1.06)                    | 1.16 (0.69, 1.95)                     | 0.62 (0.44, 0.87)                        | 0.59 (0.47, 0.75)                      |
| Blood transfusion                         | 0.45 (0.32, 0.62)                      | 0.44 (0.25, 0.79)                    | 0.51 (0.33, 0.78)                     | 0.48 (0.36, 0.66)                        | 0.41 (0.33, 0.50)                      |
| <b>Discharge Disposition and Outcomes</b> |                                        |                                      |                                       |                                          |                                        |
| Home Discharge                            | 1.97 (1.43, 2.71)                      | 1.21 (0.74, 1.98)                    | 1.89 (1.23, 2.90)                     | 1.95 (1.50, 2.55)                        | 1.91 (1.56, 2.33)                      |
| Transfer to SNF or acute care hospital    | 0.69 (0.51, 0.93)                      | 0.67 (0.40, 1.12)                    | 0.73 (0.49, 1.11)                     | 0.66 (0.49, 0.88)                        | 0.74 (0.61, 0.91)                      |
| Home Health Care                          | 0.73 (0.54, 0.99)                      | 1.25 (0.75, 2.09)                    | 0.75 (0.50, 1.12)                     | 0.71 (0.54, 0.93)                        | 0.68 (0.56, 0.82)                      |
| In-hospital Mortality                     | 1.86 (0.75, 4.62)                      | 0.64 (0.10, 4.02)                    | 0.96 (0.24, 3.90)                     | 0.85 (0.35, 2.05)                        | 1.51 (0.77, 2.96)                      |
|                                           | <b>Overall<br/>CIE (95% CI)</b>        | <b>Overall<br/>CIE (95% CI)</b>      | <b>Overall<br/>CIE (95% CI)</b>       | <b>Overall<br/>CIE (95% CI)</b>          | <b>Overall<br/>CIE (95% CI)</b>        |
| <b>LOS after AVR, days</b>                | -1.78 (-1.13, -2.42)                   | -3.34 (-1.75, -4.93)                 | -2.05 (-0.82, -3.28)                  | -1.84 (-1.24, 2.43)                      | -1.37 (-0.87, 1.86)                    |

OR, odds ratio; CI, confidence interval; CIE, change in estimate; LOS, length of stay; AVR, aortic valve replacement; TAVR, transcatheter aortic valve replacement; SAVR, surgical aortic valve replacement; SNF, skilled nursing facility.

## Supplemental References:

1. Dugoff EH, Schuler M, Stuart EA. Generalizing observational study results: Applying propensity score methods to complex surveys. *Health Serv Res.* 2014;49:284-303.
2. Parsons LS. Performing a 1: N case-control match on propensity score. *proceedings of the 29th Annual SAS users group international conference.* 2004:165-129.
